# Supplementary material for: The Cby3/ciBAR1 complex positions the annulus along the sperm flagellum during spermiogenesis
Source: PubMed Central journal article supplement — J Cell Biol. 2024 Jan 10;223(3):e202307147. doi: 10.1083/jcb.202307147 (PMC10783431; doi:10.1083/jcb.202307147), 2024-01-10

# Source data for Figure 4C

|           |   |   |
|-----------|---|---|
| Flag-Cby3 | - | + |
| HA-ciBAR1 | + | + |

HA-ciBAR1  
IP: α-Flag  
IB: α-HA

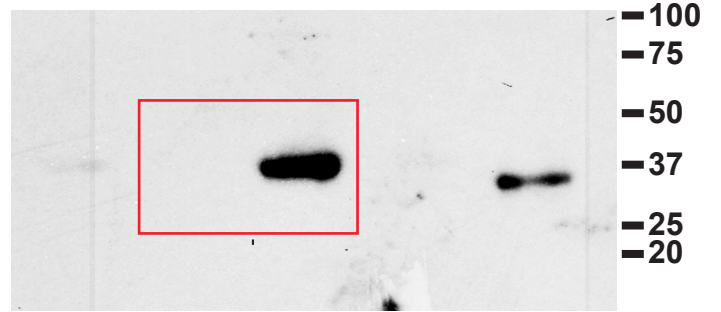

Flag-Cby3  
Lysates  
IB: α-Flag

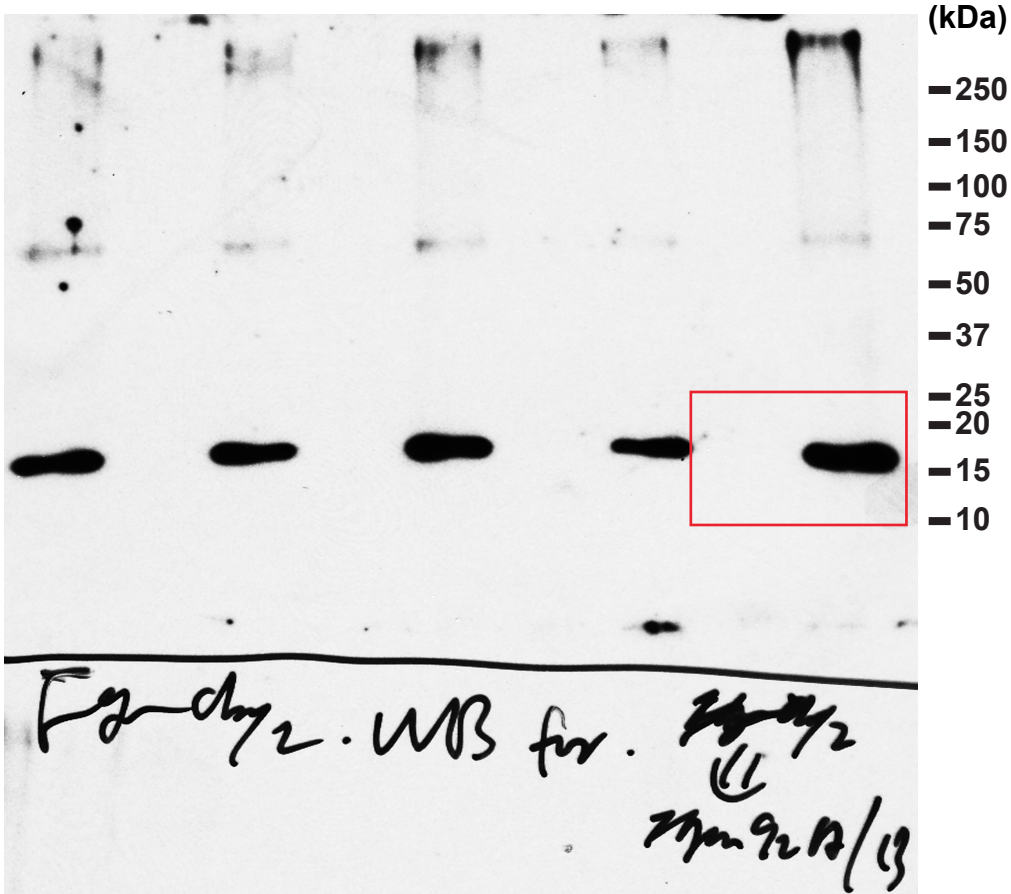

HA-ciBAR1  
Lysates  
IB: α-HA

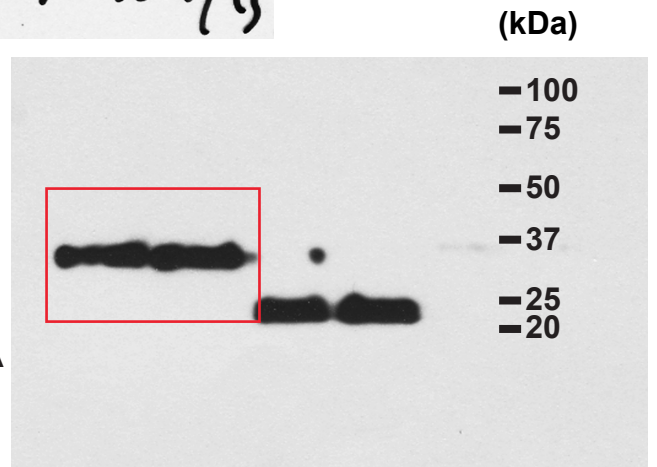

# Source data for Figure 4D

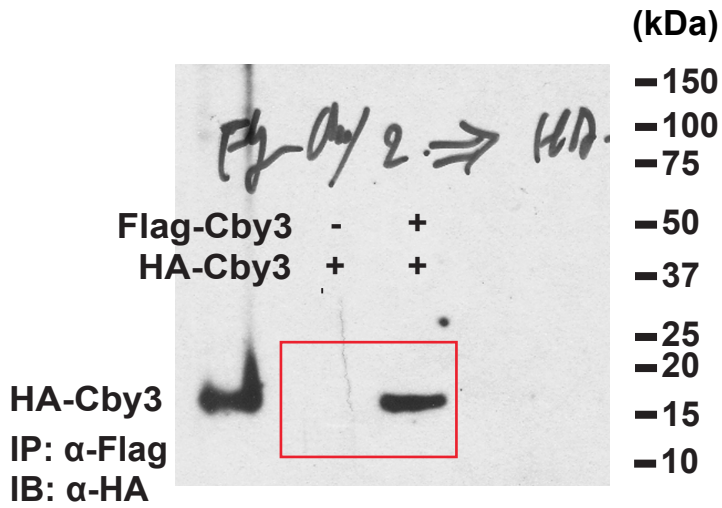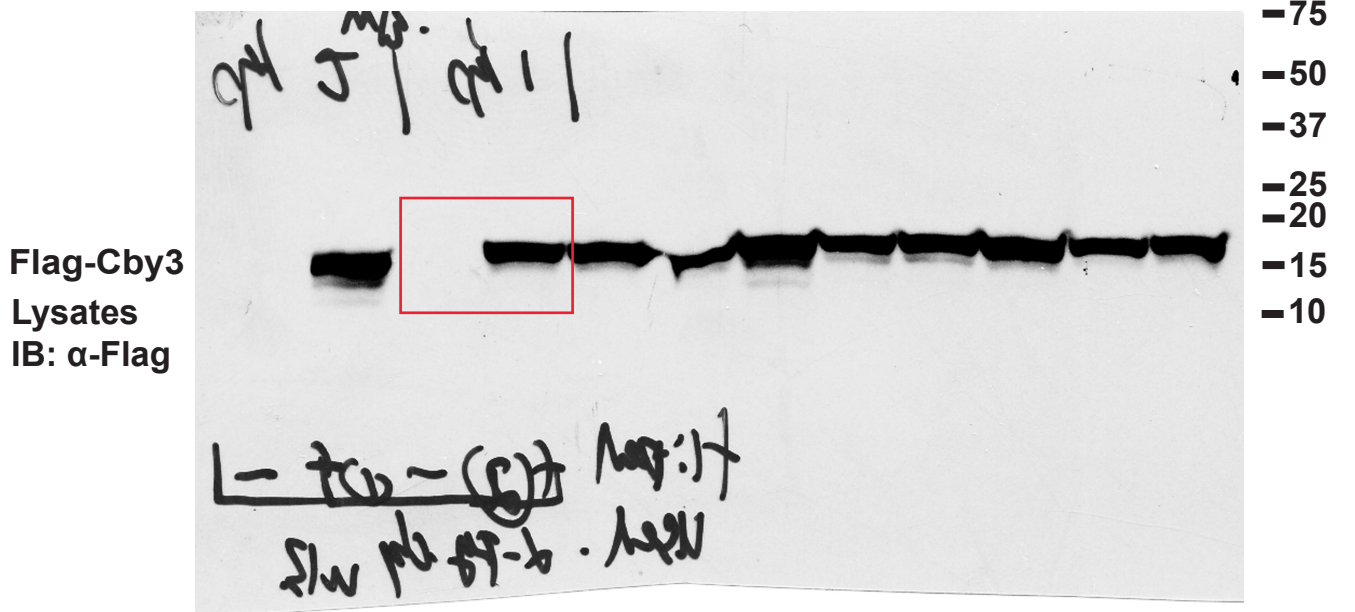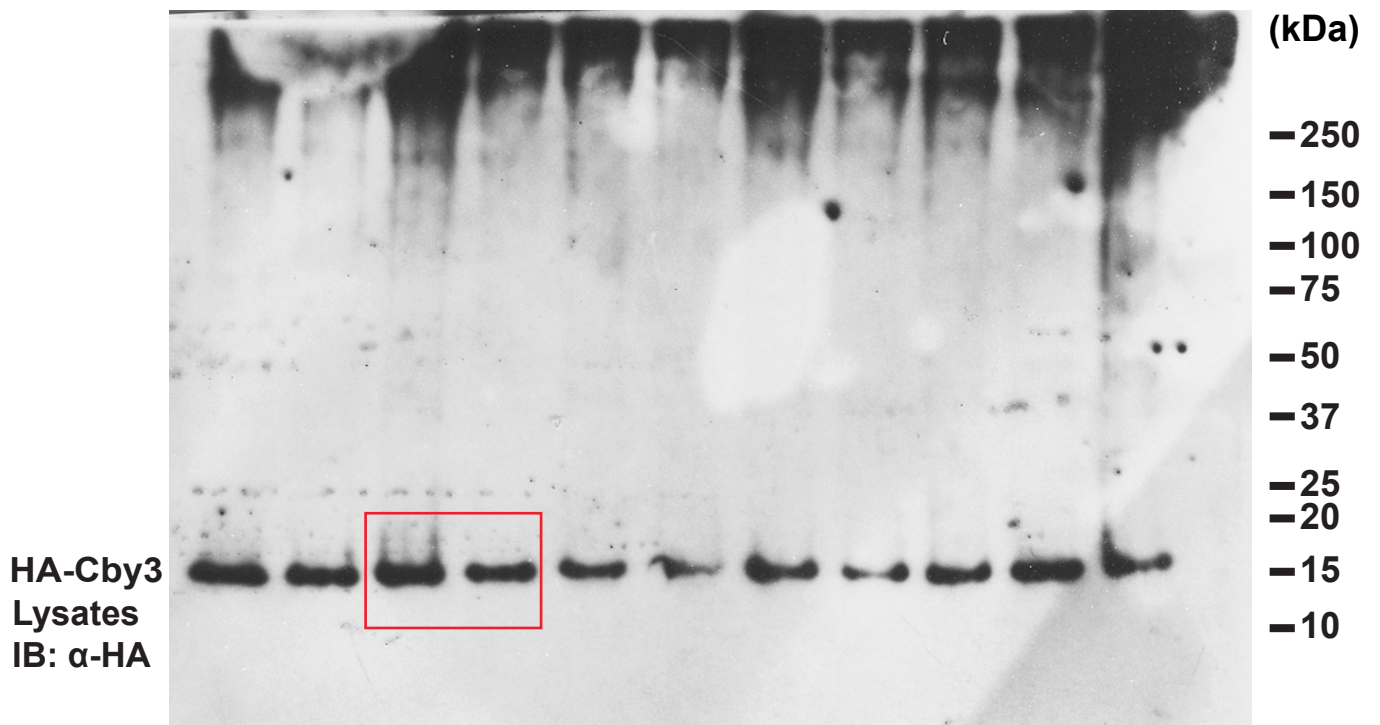

# Source data for Figure 4E

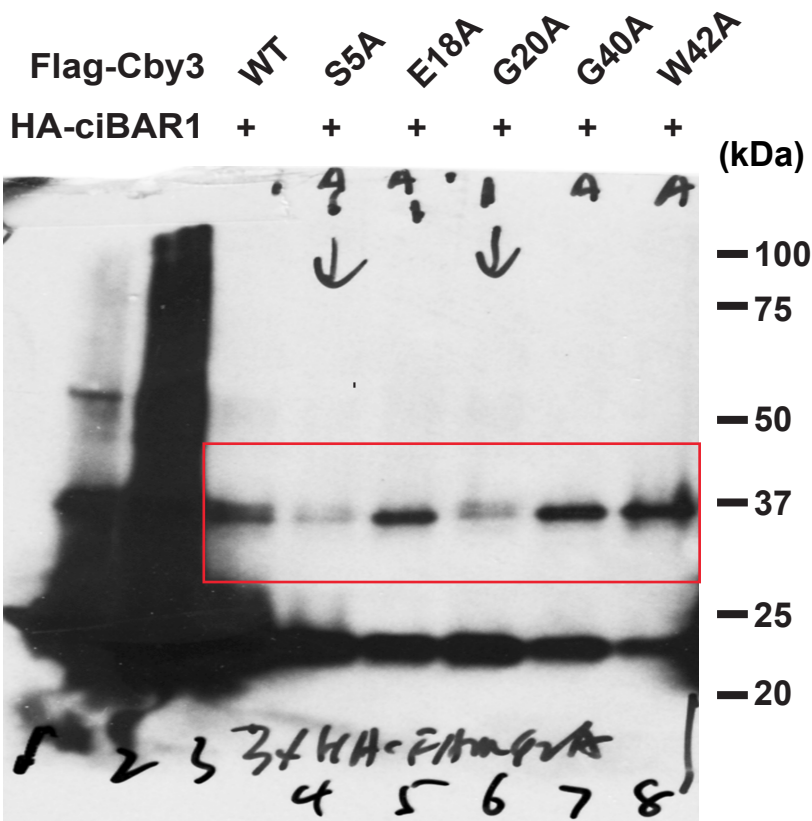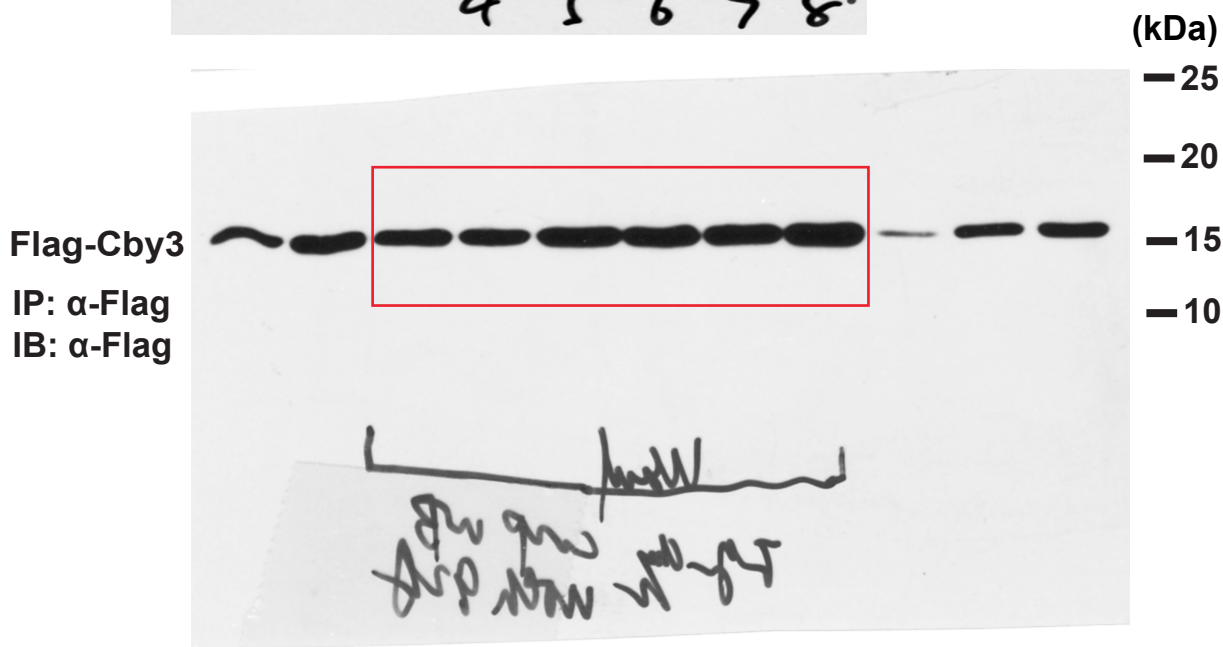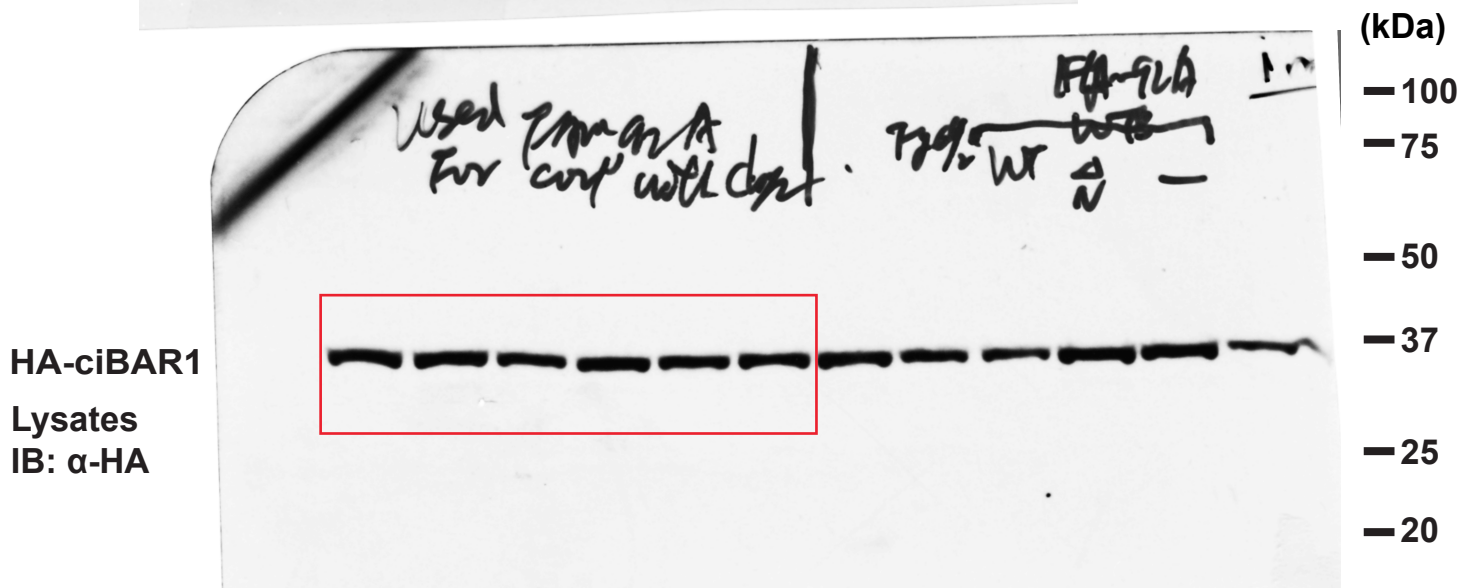

Supplement: JCB_202307147_SourceDataF4.pdf [file JCB_202307147_SourceDataF4.pdf]
