# Supplementary figures and images for: The Cby3/ciBAR1 complex positions the annulus along the sperm flagellum during spermiogenesis
Source: PubMed Central journal article supplement — J Cell Biol. 2024 Jan 10;223(3):e202307147. doi: 10.1083/jcb.202307147 (PMC10783431; doi:10.1083/jcb.202307147), 2024-01-10

# Source data for Figure 3D

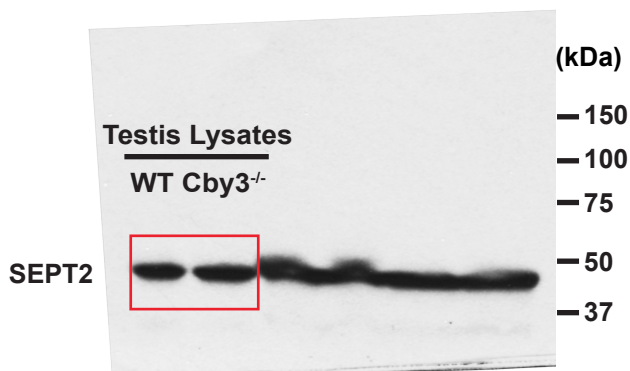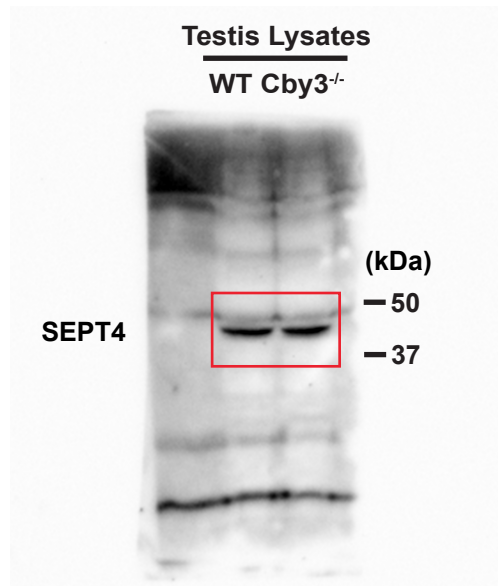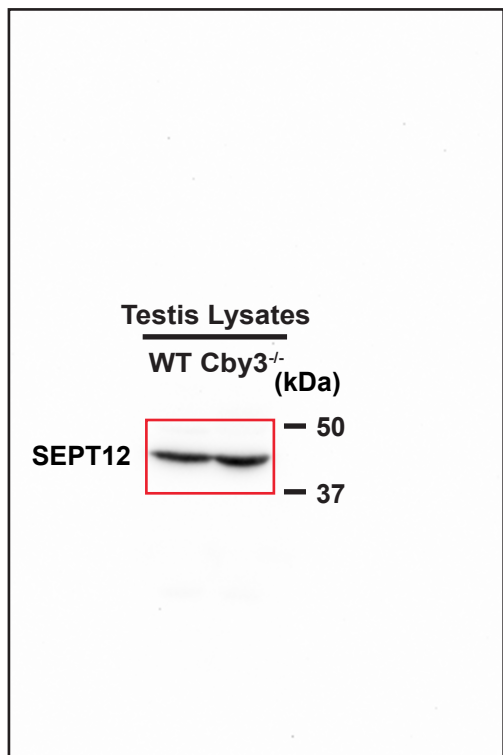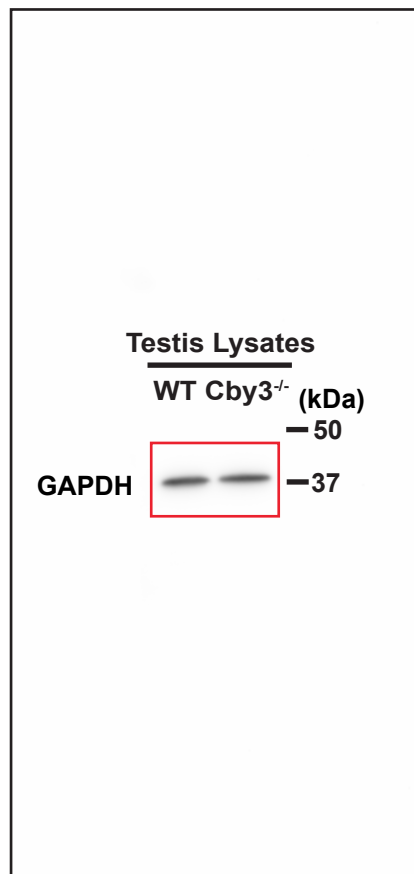

Supplement: JCB_202307147_SourceDataF3.pdf [file JCB_202307147_SourceDataF3.pdf]

# Source data for Figures S4C and S4D

## Source data for Figure S4C

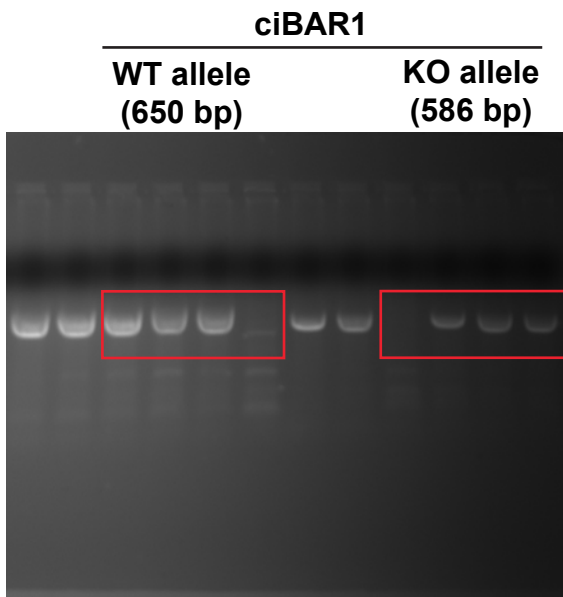

## Source data for Figure S4D

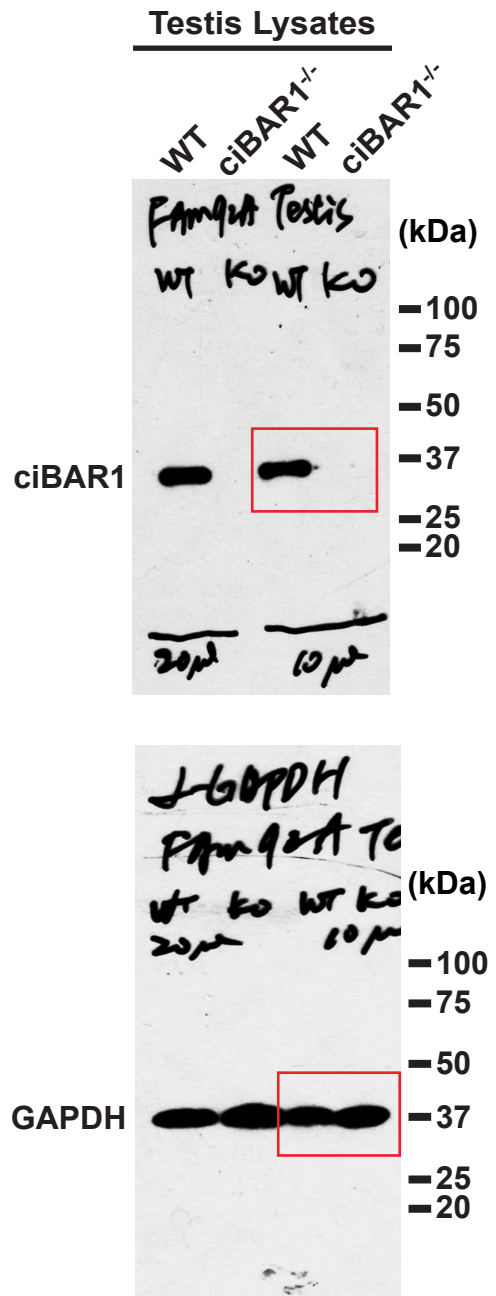

Supplement: JCB_202307147_SourceDataFS4.pdf [file JCB_202307147_SourceDataFS4.pdf]
